# Supplementary material for: Otolith Microchemistry Assessment: Evidence of Migratory Coilia nasus of Yangtze River Living in the Shengsi Sea Area
Source: MDPI journal article supplement (doi:10.3390/fishes7040172), 2022-07-18
Supplement: s1 [file s1]

**Table S1.** Freshwater coefficient of *Coilia nasus* in each water area.

| Sample code | Freshwater coefficient |
|-------------|------------------------|
| S1          | 0.20                   |
| S2          | 0.60                   |
| S3          | 0.33                   |
| S4          | 0.15                   |
| S5          | 0.44                   |
| S6          | 0.36                   |
| E1          | 0.58                   |
| E2          | 0.42                   |
| E3          | 0.29                   |
| E4          | 0.47                   |
| E5          | 0.22                   |
| E6          | 0.65                   |
| E7          | 0.00                   |
| E8          | 0.38                   |
| P1          | 0.39                   |
| P2          | 0.25                   |
| P3          | 0.58                   |
| P4          | 0.58                   |
| P5          | 0.41                   |
| P6          | 0.44                   |
| P7          | 0.41                   |
